# Supplementary material
Source: Springer Nature journal article supplement (https://www.springermedizin.de/resource/supplementary/12913_2008_778_MOESM1_ESM.pdf/9535534)

**Satisfaction with general services**

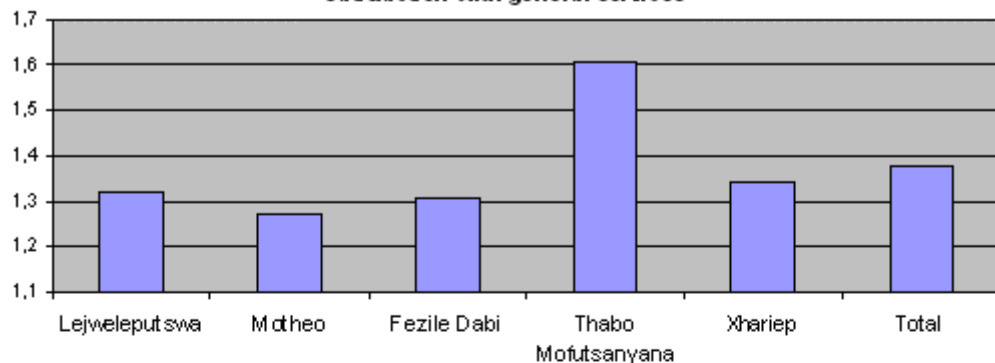

**Satisfaction with nurses**

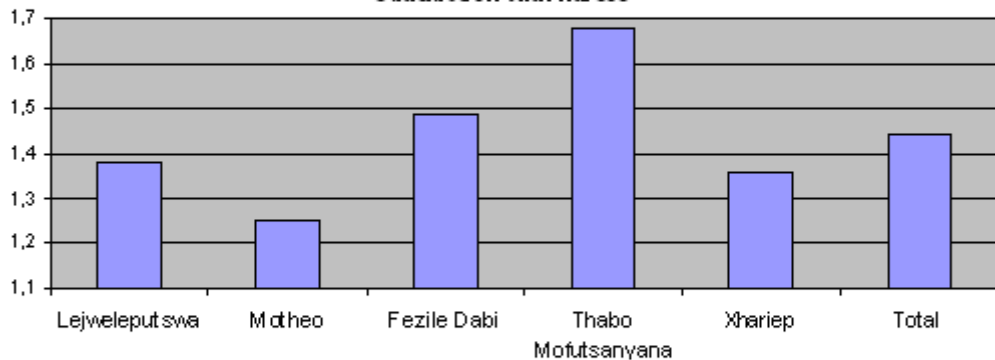

**Satisfaction with waiting times**

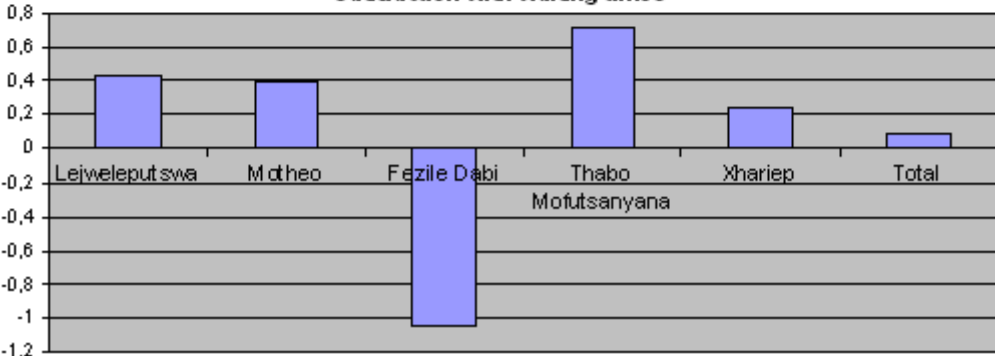

Supplement: MOESM1 [file 9535534]
